# Supplementary material for: Exploration of related factors of suicide ideation in hospitalized older adults
Source: Springer Nature journal article supplement (doi:10.1186/s12877-023-04478-w), 2023-11-16
Supplement: MOESM2 [file 12877_2023_4478_MOESM2_ESM.pdf]

# The Mini-Mental State Exam

Patient \_\_\_\_\_ Examiner \_\_\_\_\_ Date \_\_\_\_\_

Maximum Score

- |   |     |                                                                                                                                                                                                                       |
|---|-----|-----------------------------------------------------------------------------------------------------------------------------------------------------------------------------------------------------------------------|
|   |     | <b>Orientation</b>                                                                                                                                                                                                    |
| 5 | ( ) | What is the (year) (season) (date) (day) (month)?                                                                                                                                                                     |
| 5 | ( ) | Where are we (state) (country) (town) (hospital) (floor)?                                                                                                                                                             |
|   |     | <b>Registration</b>                                                                                                                                                                                                   |
| 3 | ( ) | Name 3 objects: 1 second to say each. Then ask the patient all 3 after you have said them. Give 1 point for each correct answer. Then repeat them until he/she learns all 3. Count trials and record.<br>Trials _____ |
|   |     | <b>Attention and Calculation</b>                                                                                                                                                                                      |
| 5 | ( ) | Serial 7's. 1 point for each correct answer. Stop after 5 answers. Alternatively spell "world" backward.                                                                                                              |
|   |     | <b>Recall</b>                                                                                                                                                                                                         |
| 3 | ( ) | Ask for the 3 objects repeated above. Give 1 point for each correct answer.                                                                                                                                           |
|   |     | <b>Language</b>                                                                                                                                                                                                       |
| 2 | ( ) | Name a pencil and watch.                                                                                                                                                                                              |
| 1 | ( ) | Repeat the following "No ifs, ands, or buts"                                                                                                                                                                          |
| 3 | ( ) | Follow a 3-stage command:<br>"Take a paper in your hand, fold it in half, and put it on the floor."                                                                                                                   |
| 1 | ( ) | Read and obey the following: CLOSE YOUR EYES                                                                                                                                                                          |
| 1 | ( ) | Write a sentence.                                                                                                                                                                                                     |
| 1 | ( ) | Copy the design shown.                                                                                                                                                                                                |

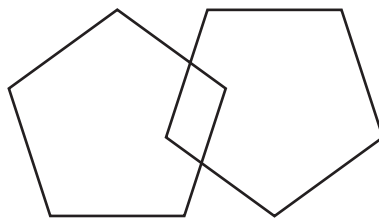

\_\_\_\_\_ Total Score  
ASSESS level of consciousness along a continuum \_\_\_\_\_  
Alert Drowsy Stupor Coma

"MINI-MENTAL STATE." A PRACTICAL METHOD FOR GRADING THE COGNITIVE STATE OF PATIENTS FOR THE CLINICIAN. *Journal of Psychiatric Research*, 12(3): 189-198, 1975. Used by permission.
